# Supplementary material for: Growth of a sinkhole in a seismic zone of the northern Apennines (Italy)
Source: Copernicus journal article supplement (doi:10.5194/nhess-18-2355-2018), 2018-09-12
Supplement: Supplementary file 1 [file nhess-18-2355-2018-supplement.zip]

Archive with 4 entries (4 files):
- S3.pdf
- S2.pdf
- nhess-18-2355-2018-supplement-title-page.pdf
- S1.pdf
