# Supplementary material for: Growth of a sinkhole in a seismic zone of the northern Apennines (Italy)
Source: Copernicus journal article supplement (doi:10.5194/nhess-18-2355-2018), 2018-09-12
Supplement: Supplementary file 1 [file nhess-18-2355-2018-supplement.zip › nhess-18-2355-2018-supplement-title-page.pdf]

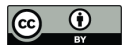

## *Supplement of*

# **Growth of a sinkhole in a seismic zone of the northern Apennines (Italy)**

**Alessandro La Rosa et al.**

*Correspondence to:* Alessandro La Rosa ([alessandro.larosa@unifi.it](mailto:alessandro.larosa@unifi.it))

- [nhess-18-2355-2018-supplement-title-page.pdf](#)
- [S1.pdf](#)
- [S2.pdf](#)
- [S3.pdf](#)

The copyright of individual parts of the supplement might differ from the CC BY 4.0 License.
