# Supplementary material for: Growth of a sinkhole in a seismic zone of the northern Apennines (Italy)
Source: Copernicus journal article supplement (doi:10.5194/nhess-18-2355-2018), 2018-09-12
Supplement: Supplementary file 1 [file nhess-18-2355-2018-supplement.zip › S1.pdf]

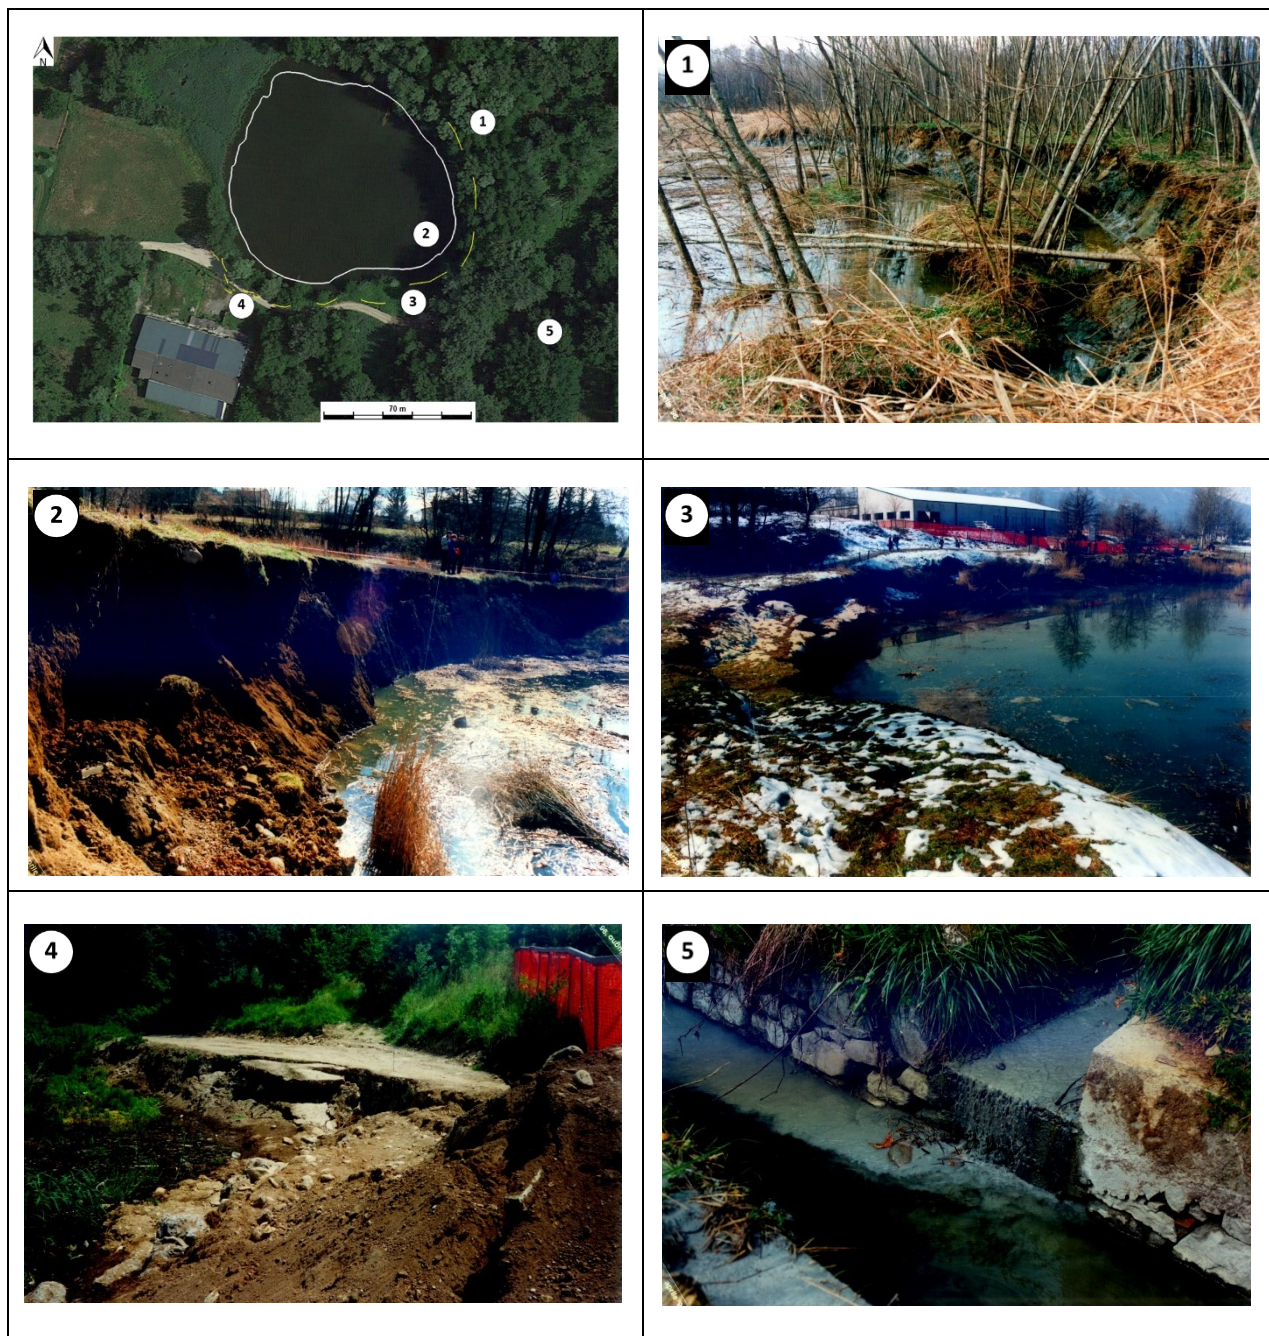

**Fig. S1 – Pictures took during the events of 1996.** The map shows the distribution of cracks (yellow lines) formed following the variation of the lake's level (white line). **1)** Cracks on the north-eastern side of the lake. **2)** minimum level of the lake. **3-4)** cracks formed around the lake. **5)** uprising of muddy waters from springs.
