# Supplementary material for: Growth of a sinkhole in a seismic zone of the northern Apennines (Italy)
Source: Copernicus journal article supplement (doi:10.5194/nhess-18-2355-2018), 2018-09-12
Supplement: Supplementary file 1 [file nhess-18-2355-2018-supplement.zip › S2.pdf]

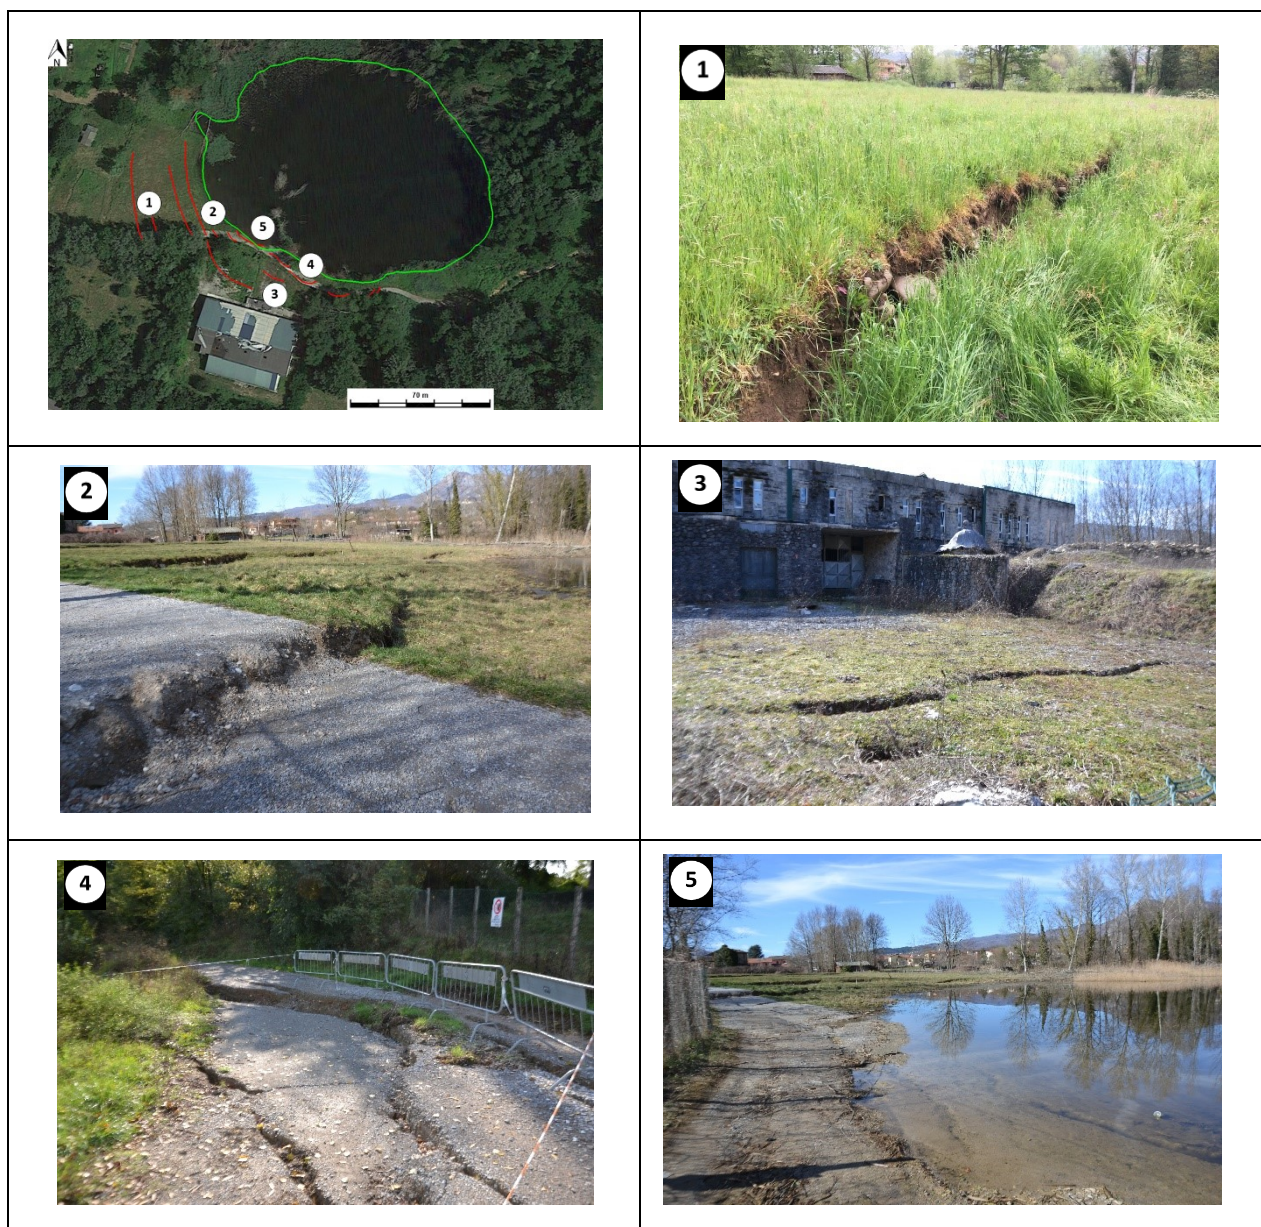

**Fig. S2 – Pictures taken during the events of 2016.** The map shows the fractures distribution (red lines) and the increase of the lake's extension (green line). **1-5)** Fractures on the south-western side of the lake
